# Supplementary material for: Pathways affected by 3,5-diiodo- l -thyronine in liver of high fat-fed rats: Evidence from two-dimensional electrophoresis, blue-native PAGE, and mass spectrometry
Source: Royal Society of Chemistry journal article supplement (doi:10.1039/c0mb00040j), 2010-09-16
Supplement: c0mb00040j.pdf [file c0mb00040j.pdf]

**Supplementary Material**

**Table 1S.** MALDI-ToF MS identification details for differentially expressed proteins in livers N, HFD and HFD+T2 rats using Protein Lynx Global Server 2.3 software (Waters Corporation, Manchester, UK). Spot numbers refer to Table 2. CAM-Cys: CAM-Cysys; Met Ox: Methionine oxidation.

| <b>No. 1 Glutamate dehydrogenase 1</b> |                |                   |                   |                    |              |            |                                |                      |
|----------------------------------------|----------------|-------------------|-------------------|--------------------|--------------|------------|--------------------------------|----------------------|
| <b>m/z</b>                             | <b>Peak mW</b> | <b>Peptide mW</b> | <b>Delta (Da)</b> | <b>Delta (ppm)</b> | <b>Start</b> | <b>End</b> | <b>Sequence</b>                | <b>Modifications</b> |
| 1730.908                               | 1729.900       | 1729.959          | -0.059            | -34                | 35           | 51         | (R)GQPSAVPQPGLTPVARR(H)        |                      |
| 1011.481                               | 1010.473       | 1010.435          | 0.038             | 38                 | 61           | 68         | (R)EDDPNFFK(M)                 |                      |
| 1000.449                               | 999.441        | 999.448           | -0.007            | -7                 | 69           | 76         | (K)MVEGFFDR(G)                 |                      |
| 1016.423                               | 1015.415       | 1015.443          | -0.028            | -27                | 69           | 76         | (K)MVEGFFDR(G)                 | Met Ox (1)           |
| 1033.485                               | 1032.477       | 1032.484          | -0.007            | -7                 | 91           | 98         | (K)TRENEEQK(R)                 |                      |
| 1894.079                               | 1893.071       | 1893.066          | 0.006             | 3                  | 108          | 123        | (R)IIKPCNHVLSLSFPIR(R)         | CAM-Cys (5)          |
| 2050.144                               | 2049.136       | 2049.167          | -0.031            | -15                | 108          | 124        | (R)IIKPCNHVLSLSFPIRR(D)        | CAM-Cys (5)          |
| 1581.735                               | 1580.727       | 1580.722          | 0.005             | 3                  | 124          | 136        | (R)RDDGSWEVIEGYR(A)            |                      |
| 1425.620                               | 1424.612       | 1424.621          | -0.009            | -6                 | 125          | 136        | (R)DDGSWEVIEGYR(A)             |                      |
| 997.505                                | 996.497        | 996.531           | -0.035            | -35                | 163          | 171        | (K)ALASLMTYK(C)                |                      |
| 2198.115                               | 2197.107       | 2197.127          | -0.020            | -9                 | 163          | 183        | (K)ALASLMTYKCAVVDVPPFGGAK(A)   | CAM-Cys (10)         |
| 2044.025                               | 2043.017       | 2043.010          | 0.007             | 4                  | 212          | 231        | (K)KGFIPGIDVPAPDMSTGER(E)      |                      |
| 1915.926                               | 1914.918       | 1914.915          | 0.004             | 2                  | 213          | 231        | (K)GFIGPGIDVPAPDMSTGER(E)      |                      |
| 1748.893                               | 1747.885       | 1747.883          | 0.002             | 1                  | 303          | 318        | (K)TFVVQGFQGNVGLHSMR(Y)        |                      |
| 1764.870                               | 1763.863       | 1763.878          | -0.015            | -9                 | 303          | 318        | (K)TFVVQGFQGNVGLHSMR(Y)        | Met Ox (15)          |
| 1958.048                               | 1957.040       | 1957.031          | 0.010             | 5                  | 347          | 363        | (K)ELEDFKLQHGSI LGFPK(A)       |                      |
| 1196.648                               | 1195.641       | 1195.671          | -0.031            | -26                | 353          | 363        | (K)LQHGSI LGFPK(A)             |                      |
| 2293.109                               | 2292.101       | 2292.119          | -0.019            | -8                 | 366          | 386        | (K)VYEGSILEADCDILIPAASEK(Q)    | CAM-Cys (11)         |
| 2242.172                               | 2241.165       | 2241.164          | 0.000             | 0                  | 400          | 420        | (K)IIAEGANGPTTPEADKIFLER(N)    |                      |
| 2742.504                               | 2741.496       | 2741.414          | 0.082             | 30                 | 421          | 444        | (R)NIMVIPDLYLNAGGVTVSYFEWLK(N) |                      |
| 1059.515                               | 1058.507       | 1058.526          | -0.019            | -18                | 445          | 453        | (K)NLNHVSYGR(L)                |                      |
| 956.509                                | 955.501        | 955.513           | -0.011            | -12                | 454          | 460        | (R)LTFKYER(D)                  |                      |
| 2369.209                               | 2368.201       | 2368.112          | 0.090             | 38                 | 458          | 476        | (K)YERDSNYHLLMSVQESLER(K)      |                      |
| 1920.919                               | 1919.911       | 1919.905          | 0.006             | 3                  | 461          | 476        | (R)DSNYHLLMSVQESLER(K)         |                      |
| 2056.040                               | 2055.032       | 2055.054          | -0.022            | -11                | 478          | 496        | (K)FGKHGGTIPVVPTAEFQDR(I)      |                      |
| 1723.869                               | 1722.861       | 1722.869          | -0.008            | -5                 | 481          | 496        | (K)HGGTIPVVPTAEFQDR(I)         |                      |
| 2164.105                               | 2163.097       | 2163.063          | 0.034             | 16                 | 497          | 516        | (R)ISGASEKDIVHSGLAYTMER(S)     |                      |
| 1491.715                               | 1490.707       | 1490.719          | -0.011            | -8                 | 504          | 516        | (K)DIVHSGLAYTMER(S)            |                      |

|          |          |          |        |     |     |     |                    |
|----------|----------|----------|--------|-----|-----|-----|--------------------|
| 1394.728 | 1393.720 | 1393.739 | -0.019 | -14 | 524 | 535 | (R)TAMKYNLGLDLR(T) |
| 963.511  | 962.503  | 962.519  | -0.016 | -16 | 528 | 535 | (K)YNLGLDLR(T)     |
| 1079.540 | 1078.533 | 1078.566 | -0.033 | -31 | 536 | 545 | (R)TAAYVNAIEK(V)   |

### No. 2 ATP synthase alpha chain

| m/z      | Peak mW  | Peptide mW | Delta (Da) | Delta (ppm) | Start | End | Sequence                      | Modifications |
|----------|----------|------------|------------|-------------|-------|-----|-------------------------------|---------------|
| 1020.494 | 1019.486 | 1019.507   | -0.021     | -20         | 252   | 260 | (K)RLTDADAMK(Y)               |               |
| 1287.670 | 1286.662 | 1286.687   | -0.025     | -19         | 296   | 306 | (K)HALIIYDDLK(Q)              |               |
| 1553.759 | 1552.752 | 1552.731   | 0.020      | 13          | 325   | 337 | (R)EAYPGDVFYLSR(L)            |               |
| 1096.503 | 1095.495 | 1095.542   | -0.047     | -43         | 415   | 424 | (R)AMKQVAGTMK(L)              | 2 Met Ox      |
| 2338.148 | 2337.141 | 2337.160   | -0.020     | -8          | 432   | 453 | (R)EVAFAAQFGSLLDAATQQLLSR(G)  |               |
| 2309.140 | 2308.132 | 2308.152   | -0.020     | -9          | 463   | 483 | (K)QGQYSPMAIEEQVAVIYAGVR(G)   |               |
| 2325.173 | 2324.165 | 2324.147   | 0.018      | 8           | 463   | 483 | (K)QGQYSPMAIEEQVAVIYAGVR(G)   | Met Ox (7)    |
| 2711.441 | 2710.433 | 2710.455   | -0.022     | -8          | 494   | 517 | (K)ITKFESAFVSHVVSQHQSLGNIR(S) |               |
| 2369.210 | 2368.202 | 2368.229   | -0.027     | -11         | 497   | 517 | (K)FESAFVSHVVSQHQSLGNIR(S)    |               |
| 1577.819 | 1576.811 | 1576.850   | -0.039     | -25         | 530   | 543 | (K)LKEIVTNFLAGFEP(-)          |               |

### No. 3 Carnitine O palmitoyltransferase 2

| m/z      | Peak mW  | Peptide mW | Delta (Da) | Delta (ppm) | Start | End | Sequence                     | Modifications |
|----------|----------|------------|------------|-------------|-------|-----|------------------------------|---------------|
| 1063.586 | 1062.578 | 1062.583   | -0.005     | -5          | 1     | 8   | (-)MMPRLFR(A)                |               |
| 1964.046 | 1963.038 | 1963.028   | 0.010      | 5           | 63    | 78  | (K)RYLNAQKPLLDLSQFR(R)       |               |
| 1807.960 | 1806.952 | 1806.926   | 0.026      | 14          | 64    | 78  | (R)YLNAQKPLLDLSQFR(R)        |               |
| 2415.234 | 2414.226 | 2414.148   | 0.079      | 33          | 105   | 124 | (K)QNKHTSYISGPWFDMYLTAR(D)   |               |
| 2431.179 | 2430.171 | 2430.143   | 0.029      | 12          | 105   | 124 | (K)QNKHTSYISGPWFDMYLTAR(D)   | Met Ox (15)   |
| 2044.989 | 2043.981 | 2043.951   | 0.030      | 15          | 108   | 124 | (K)HTSYISGPWFDMYLTAR(D)      |               |
| 2060.978 | 2059.970 | 2059.946   | 0.024      | 12          | 108   | 124 | (K)HTSYISGPWFDMYLTAR(D)      | Met Ox (12)   |
| 2066.000 | 2064.992 | 2064.998   | -0.005     | -3          | 125   | 142 | (R)DSIVLNFNPFMAFNPDPK(S)     |               |
| 2082.021 | 2081.013 | 2080.993   | 0.020      | 10          | 125   | 142 | (R)DSIVLNFNPFMAFNPDPK(S)     | Met Ox (11)   |
| 1125.521 | 1124.513 | 1124.510   | 0.003      | 3           | 143   | 151 | (K)SEYNDQLTR(A)              |               |
| 1031.593 | 1030.586 | 1030.577   | 0.008      | 8           | 152   | 161 | (R)ATNLTSAVR(F)              |               |
| 1993.066 | 1992.058 | 1992.068   | -0.010     | -5          | 165   | 182 | (K)TLQAGLLEPEVFHLNPSK(S)     |               |
| 939.450  | 938.442  | 938.446    | -0.003     | -4          | 183   | 190 | (K)SDTDAFKR(L)               |               |
| 1701.896 | 1700.888 | 1700.885   | 0.003      | 2           | 226   | 239 | (R)IPRPNRDELFTDTK(A)         |               |
| 2484.242 | 2483.234 | 2483.222   | 0.012      | 5           | 275   | 296 | (K)YILSDSSPVPEFPVAYLTSENR(D) |               |

|          |          |          |        |     |     |     |                             |              |
|----------|----------|----------|--------|-----|-----|-----|-----------------------------|--------------|
| 1144.659 | 1143.652 | 1143.604 | 0.048  | 42  | 297 | 305 | (R)DVWAE LRQK(L)            |              |
| 1278.633 | 1277.625 | 1277.650 | -0.025 | -20 | 306 | 316 | (K)LIFDGNEETLK(K)           |              |
| 967.481  | 966.473  | 966.502  | -0.029 | -30 | 432 | 439 | (K)EKFDTTVK(T)              |              |
| 1999.019 | 1998.011 | 1998.042 | -0.031 | -15 | 434 | 450 | (K)FDTTVKTLSIDSIQFQR(G)     |              |
| 1307.650 | 1306.642 | 1306.688 | -0.046 | -35 | 440 | 450 | (K)TLSIDSIQFQR(G)           |              |
| 1549.813 | 1548.805 | 1548.826 | -0.021 | -13 | 440 | 453 | (K)TLSIDSIQFQRGGK(E)        |              |
| 2150.117 | 2149.109 | 2149.135 | -0.026 | -12 | 459 | 477 | (K)KQLSPDAVAQLAFQMAFLR(Q)   | Met Ox (15)  |
| 2022.096 | 2021.088 | 2021.040 | 0.048  | 24  | 460 | 477 | (K)QLSPDAVAQLAFQMAFLR(Q)    | Met Ox (14)  |
| 1519.844 | 1518.836 | 1518.852 | -0.016 | -10 | 499 | 511 | (R)TETIRPASIFTKR(C)         |              |
| 1024.495 | 1023.487 | 1023.492 | -0.005 | -5  | 511 | 518 | (K)RCSEAFVR(D)              | CAM-Cys (2)  |
| 2171.054 | 2170.046 | 2169.961 | 0.085  | 39  | 519 | 537 | (R)DPSKHSV GELQHMM AECSK(Y) | CAM-Cys (17) |
| 1401.709 | 1400.701 | 1400.698 | 0.003  | 2   | 632 | 642 | (R)NAREFLHC VQK(C)          | CAM-Cys (8)  |
| 1409.639 | 1408.631 | 1408.654 | -0.023 | -17 | 643 | 654 | (K)CLE DIFDALE GK(A)        | CAM-Cys (1)  |

#### No. 4 Purine nucleoside phosphorilase

| m/z      | Peak mW  | Peptide mW | Delta (Da) | Delta (ppm) | Start | End | Sequence                         | Modifications            |
|----------|----------|------------|------------|-------------|-------|-----|----------------------------------|--------------------------|
| 2915.532 | 2914.524 | 2914.400   | 0.124      | 43          | 42    | 67  | (K)LTQPQAFDYNEIPNFPQSTVQGHAGR(L) |                          |
| 1022.545 | 1021.537 | 1021.571   | -0.034     | -33         | 68    | 76  | (R)LVFGFLNGR(S)                  |                          |
| 1987.982 | 1986.974 | 1986.959   | 0.015      | 8           | 68    | 84  | (R)LVFGFLNGRSCVMMQGR(F)          | CAM-Cys (11), Met Ox     |
| 968.386  | 967.378  | 967.404    | -0.026     | -26         | 77    | 84  | (R)SCVMMQGR(F)                   | CAM-Cys (2)              |
| 1361.575 | 1360.567 | 1360.612   | -0.045     | -33         | 85    | 95  | (R)FHM YEGYSLSK(V)               |                          |
| 1192.621 | 1191.614 | 1191.632   | -0.019     | -16         | 124   | 133 | (K)FEVGDIMLIR(D)                 |                          |
| 1737.861 | 1736.853 | 1736.842   | 0.011      | 6           | 134   | 148 | (R)DHINLPGFCGQNPLR(G)            | CAM-Cys (9)              |
| 1172.543 | 1171.535 | 1171.497   | 0.038      | 32          | 159   | 168 | (R)FPAMSDAYDR(D)                 |                          |
| 1574.652 | 1573.644 | 1573.665   | -0.021     | -13         | 159   | 171 | (R)FPAMSDAYDRDMR(Q)              |                          |
| 992.538  | 991.530  | 991.524    | 0.006      | 6           | 172   | 179 | (R)QKAFNAWK(Q)                   |                          |
| 1465.681 | 1464.673 | 1464.693   | -0.020     | -14         | 174   | 185 | (K)AFNAWKQMGEQR(E)               |                          |
| 2802.407 | 2801.399 | 2801.325   | 0.074      | 27          | 186   | 210 | (R)ELQEGTYIMSAGPTFETVAESCLR(M)   | CAM-Cys (22)             |
| 2818.440 | 2817.432 | 2817.320   | 0.113      | 40          | 186   | 210 | (R)ELQEGTYIMSAGPTFETVAESCLR(M)   | Met Ox (9), CAM-Cys (22) |
| 1916.021 | 1915.013 | 1914.991   | 0.022      | 12          | 211   | 229 | (R)MLGADAVGMSTVPEVIVAR(H)        |                          |
| 1748.905 | 1747.898 | 1747.919   | -0.022     | -13         | 230   | 244 | (R)HCGLRVFGFSLITNK(V)            | CAM-Cys (2)              |
| 1240.627 | 1239.620 | 1239.580   | 0.039      | 32          | 245   | 254 | (K)VVM DYN NLEK(A)               | Met Ox (3)               |
| 1168.594 | 1167.586 | 1167.589   | -0.003     | -2          | 255   | 265 | (K)ASHQEVLEAGK(A)                |                          |
| 2228.212 | 2227.204 | 2227.203   | 0.001      | 0           | 266   | 285 | (K)AAAQKLEQFVSILMESIPPR(E)       |                          |
| 2244.188 | 2243.180 | 2243.199   | -0.019     | -8          | 266   | 285 | (K)AAAQKLEQFVSILMESIPPR(E)       | Met Ox (14)              |

|          |          |          |        |    |     |     |                         |            |
|----------|----------|----------|--------|----|-----|-----|-------------------------|------------|
| 1758.953 | 1757.945 | 1757.939 | 0.007  | 4  | 271 | 285 | (K)LEQFVSILMESIPPR(E)   |            |
| 1774.933 | 1773.925 | 1773.933 | -0.008 | -4 | 271 | 285 | (K)LEQFVSILMESIPPR(E)   | Met Ox (9) |
| 2044.079 | 2043.071 | 2043.082 | -0.012 | -6 | 271 | 287 | (K)LEQFVSILMESIPPRER(A) |            |

#### No. 5 Sulfotransferase 1 A1

| m/z      | Peak mW  | Peptide mW | Delta (Da) | Delta (ppm) | Start | End | Sequence                    | Modifications |
|----------|----------|------------|------------|-------------|-------|-----|-----------------------------|---------------|
| 1439.787 | 1438.780 | 1438.776   | 0.004      | 3           | 1     | 12  | (-)MEFSRPPLVHVK(G)          |               |
| 2387.154 | 2386.146 | 2386.155   | -0.009     | -4          | 45    | 65  | (K)SGTTWMSEILDMIYQGGKLEK(C) |               |
| 1909.921 | 1908.913 | 1908.925   | -0.012     | -6          | 82    | 99  | (K)CPGVPSGLETLEETPAPR(L)    | CAM-Cys (1)   |
| 1803.024 | 1802.017 | 1802.030   | -0.014     | -8          | 103   | 118 | (K)THLPLSLLPQSLLDQK(V)      |               |
| 918.433  | 917.425  | 917.440    | -0.015     | -16         | 174   | 179 | (K)EWWELR(H)                |               |
| 1774.895 | 1773.887 | 1773.909   | -0.022     | -13         | 180   | 193 | (R)HTHPVLYLFYEDIK(E)        |               |
| 2243.156 | 2242.148 | 2242.142   | 0.005      | 2           | 180   | 197 | (R)HTHPVLYLFYEDIKENPK(R)    |               |
| 975.553  | 974.545  | 974.591    | -0.046     | -47         | 202   | 209 | (K)KILEFLGR(S)              |               |
| 1925.940 | 1924.932 | 1924.953   | -0.021     | -11         | 210   | 226 | (R)SLPEETVDSIVHHTSFK(K)     |               |
| 1924.914 | 1923.906 | 1923.908   | -0.001     | -1          | 255   | 271 | (K)GTTGDWKNFTVAQNER(F)      |               |
| 1179.570 | 1178.563 | 1178.568   | -0.005     | -5          | 262   | 271 | (K)NTFTVAQNER(F)            |               |

#### No. 6 Hydroxymethylglutaryl-CoA synthase

| m/z      | Peak mW  | Peptide mW | Delta (Da) | Delta (ppm) | Start | End | Sequence                      | Modifications               |
|----------|----------|------------|------------|-------------|-------|-----|-------------------------------|-----------------------------|
| 1141.676 | 1140.668 | 1140.654   | 0.014      | 12          | 36    | 46  | (R)FSTIPPAPLAK(T)             |                             |
| 2626.363 | 2625.355 | 2625.321   | 0.034      | 13          | 53    | 75  | (K)DVGILALEVYFPAQYVDQTDLEK(F) |                             |
| 994.527  | 993.519  | 993.524    | -0.005     | -5          | 84    | 92  | (K)YTVGLGQTR(M)               |                             |
| 2356.118 | 2355.111 | 2355.102   | 0.008      | 4           | 93    | 112 | (R)MGFCSVQEDINSLCLTVVQR(L)    | CAM-Cys (4, 14)             |
| 2372.188 | 2371.180 | 2371.097   | 0.083      | 35          | 93    | 112 | (R)MGFCSVQEDINSLCLTVVQR(L)    | Met Ox (1), CAM-Cys (4, 14) |
| 1142.598 | 1141.591 | 1141.624   | -0.034     | -30         | 117   | 126 | (R)TKLPWDAVGR(L)              |                             |
| 1217.615 | 1216.608 | 1216.655   | -0.048     | -39         | 127   | 137 | (R)LEVGTETIIDK(S)             |                             |
| 1432.724 | 1431.716 | 1431.782   | -0.066     | -46         | 127   | 139 | (R)LEVGTETIIDKSK(A)           |                             |
| 1095.658 | 1094.650 | 1094.645   | 0.005      | 4           | 222   | 231 | (K)APLVLEQGLR(G)              |                             |
| 1052.574 | 1051.566 | 1051.549   | 0.017      | 16          | 257   | 264 | (K)LSIQCYLR(A)                | CAM-Cys (5)                 |
| 959.464  | 958.456  | 958.444    | 0.012      | 12          | 269   | 275 | (R)CYAAYRR(K)                 | CAM-Cys (1)                 |
| 932.510  | 931.502  | 931.527    | -0.025     | -27         | 307   | 314 | (K)MVQKSLAR(L)                |                             |
| 2251.094 | 2250.086 | 2250.063   | 0.023      | 10          | 315   | 333 | (R)LMFNDFLSSSSDKQNNLYK(G)     |                             |

|          |          |          |        |     |     |     |                          |            |
|----------|----------|----------|--------|-----|-----|-----|--------------------------|------------|
| 925.428  | 924.420  | 924.438  | -0.017 | -19 | 359 | 366 | (K)ASLDMFNK(K)           |            |
| 941.472  | 940.464  | 940.432  | 0.032  | 34  | 359 | 366 | (K)ASLDMFNK(K)           | Met Ox (5) |
| 1885.007 | 1883.999 | 1883.920 | 0.079  | 42  | 407 | 424 | (R)IGAFSYGSGLAASFFSFR(V) |            |
| 1000.532 | 999.524  | 999.487  | 0.037  | 37  | 428 | 437 | (K)DASPGSPLEK(L)         |            |

### No. 7 Hydroxymethylglutaryl-CoA synthase

| m/z      | Peak mW  | Peptide mW | Delta (Da) | Delta (ppm) | Start | End | Sequence                        | Modifications              |
|----------|----------|------------|------------|-------------|-------|-----|---------------------------------|----------------------------|
| 2626.347 | 2625.340 | 2625.321   | 0.019      | 7           | 53    | 75  | (K)DVGILALEVYFPAQYVDQTDLEK(F)   |                            |
| 1853.910 | 1852.902 | 1852.943   | -0.041     | -22         | 76    | 92  | (K)FNNVEAGKYTVGLGQTR(M)         |                            |
| 994.502  | 993.495  | 993.524    | -0.030     | -30         | 84    | 92  | (K)YTVGLGQTR(M)                 |                            |
| 2356.102 | 2355.095 | 2355.102   | -0.008     | -3          | 93    | 112 | (R)MGFCSVQEDINSLCLTVVQR(L)      | CAM-Cys (4, 14)            |
| 2372.105 | 2371.097 | 2371.097   | 0.000      | 0           | 93    | 112 | (R)MGFCSVQEDINSLCLTVVQR(L)      | Met Ox (1), CAM-Cys (4,14) |
| 1142.600 | 1141.592 | 1141.624   | -0.033     | -29         | 117   | 126 | (R)TKLPWDAVGR(L)                |                            |
| 913.464  | 912.456  | 912.482    | -0.026     | -29         | 119   | 126 | (K)LPWDAVGR(L)                  |                            |
| 1095.616 | 1094.608 | 1094.645   | -0.037     | -34         | 222   | 231 | (K)APLVLEQGLR(G)                |                            |
| 2859.448 | 2858.440 | 2858.322   | 0.118      | 41          | 232   | 256 | (R)GTHMENAYDFYKPNLASEYPLVDGK(L) |                            |
| 1052.523 | 1051.515 | 1051.549   | -0.033     | -32         | 257   | 264 | (K)LSIQCYLR(A)                  | CAM-Cys (5)                |
| 959.455  | 958.447  | 958.444    | 0.003      | 3           | 269   | 275 | (R)CYAAYRR(K)                   | CAM-Cys (1)                |
| 2871.445 | 2870.437 | 2870.316   | 0.121      | 42          | 283   | 306 | (K)QAGNNQPFTLDDVQYMIFHTPFCK(M)  | CAM-Cys (23)               |
| 1490.650 | 1489.642 | 1489.676   | -0.034     | -23         | 315   | 327 | (R)LMFNDFLSSSSDK(Q)             |                            |
| 2251.095 | 2250.087 | 2250.063   | 0.024      | 11          | 315   | 333 | (R)LMFNDFLSSSSDKQNNLYK(G)       |                            |
| 997.452  | 996.444  | 996.476    | -0.032     | -33         | 343   | 350 | (K)LEETYTNK(D)                  |                            |
| 925.435  | 924.427  | 924.438    | -0.010     | -11         | 359   | 366 | (K)ASLDMFNK(K)                  |                            |
| 1053.522 | 1052.514 | 1052.533   | -0.019     | -18         | 359   | 367 | (K)ASLDMFNKK(T)                 |                            |
| 2397.257 | 2396.249 | 2396.144   | 0.106      | 44          | 474   | 494 | (K)VNFSPPGDTSNLFPGTWYLER(V)     |                            |
| 958.459  | 957.451  | 957.445    | 0.006      | 7           | 495   | 501 | (R)VDEMHRK(K)                   | Met Ox (4)                 |

### No. 8 Ornithine aminotransferase

| m/z      | Peak mW  | Peptide mW | Delta (Da) | Delta (ppm) | Start | End | Sequence              | Modifications |
|----------|----------|------------|------------|-------------|-------|-----|-----------------------|---------------|
| 1767.867 | 1766.859 | 1766.848   | 0.011      | 6           | 32    | 46  | (K)KTEQGPPSSEYIFER(E) |               |
| 1736.880 | 1735.873 | 1735.879   | -0.007     | -4          | 50    | 64  | (K)YGAHNYHPLVALER(G)  |               |
| 1410.698 | 1409.690 | 1409.676   | 0.014      | 10          | 65    | 76  | (R)GKGIYMWDVEGR(Q)    |               |
| 1225.559 | 1224.551 | 1224.560   | -0.009     | -7          | 67    | 76  | (K)GIYMWDVEGR(Q)      |               |

|          |          |          |        |     |     |     |                                  |              |
|----------|----------|----------|--------|-----|-----|-----|----------------------------------|--------------|
| 1241.576 | 1240.568 | 1240.555 | 0.014  | 11  | 67  | 76  | (K)GIYMWDVEGR(Q)                 | Met Ox (4)   |
| 2312.063 | 2311.055 | 2311.048 | 0.007  | 3   | 77  | 96  | (R)QYFDLSAYGAVSQGHCHK(I)         | CAM-Cys (17) |
| 1277.680 | 1276.673 | 1276.670 | 0.003  | 2   | 97  | 107 | (K)IIEAMKSQVDK(L)                | Met Ox (5)   |
| 1247.645 | 1246.637 | 1246.688 | -0.051 | -41 | 103 | 113 | (K)SQVDKLTLSR(A)                 |              |
| 1952.934 | 1951.927 | 1951.921 | 0.006  | 3   | 114 | 129 | (R)AFYNNVLGEYEEYITK(L)           |              |
| 909.467  | 908.459  | 908.487  | -0.028 | -30 | 155 | 161 | (R)RWGYTVK(G)                    |              |
| 1464.768 | 1463.760 | 1463.804 | -0.043 | -30 | 168 | 180 | (K)AKIVFAVGNFWGR(T)              |              |
| 1265.666 | 1264.658 | 1264.672 | -0.013 | -11 | 170 | 180 | (K)IVFAVGNFWGR(T)                |              |
| 1810.974 | 1809.966 | 1809.974 | -0.008 | -4  | 256 | 271 | (R)HQVLFIADEIQTGLAR(T)           |              |
| 2074.145 | 2073.137 | 2073.137 | 0.000  | 0   | 275 | 292 | (R)WLAVDHENVRPDI VLLGK(A)        |              |
| 2178.119 | 2177.111 | 2177.122 | -0.010 | -5  | 332 | 351 | (R)IAIAALEVLEEEHLAENADK(M)       |              |
| 2819.562 | 2818.554 | 2818.490 | 0.064  | 23  | 332 | 357 | (R)IAIAALEVLEEEHLAENADKMGAILR(K) |              |
| 1056.584 | 1055.576 | 1055.598 | -0.022 | -21 | 363 | 372 | (K)LPSDVVTAVR(G)                 |              |
| 1153.711 | 1152.704 | 1152.734 | -0.031 | -27 | 373 | 383 | (R)GKGLLNAIVIR(E)                |              |
| 968.605  | 967.597  | 967.618  | -0.021 | -21 | 375 | 383 | (K)GLLNAIVIR(E)                  |              |
| 1889.053 | 1888.045 | 1888.065 | -0.020 | -10 | 397 | 413 | (R)LRDNGLLAKPTHGDIIR(L)          |              |
| 1619.862 | 1618.854 | 1618.879 | -0.026 | -16 | 399 | 413 | (R)DNGLLAKPTHGDIIR(L)            |              |
| 1492.866 | 1491.859 | 1491.866 | -0.008 | -5  | 414 | 426 | (R)LAPPLVIKEDIIR(E)              |              |

### No. 9 Heat shock protein 75 kDa

| m/z      | Peak mW  | Peptide mW | Delta (Da) | Delta (ppm) | Start | End | Sequence                         | Modifications            |
|----------|----------|------------|------------|-------------|-------|-----|----------------------------------|--------------------------|
| 989.511  | 988.503  | 988.461    | 0.042      | 42          | 90    | 97  | (K)HEFQAETK(K)                   |                          |
| 927.570  | 926.562  | 926.591    | -0.029     | -32         | 98    | 105 | (K)KLLDIVAR(S)                   |                          |
| 1506.791 | 1505.783 | 1505.845   | -0.062     | -41         | 99    | 111 | (K)LLDIVARSLYSEK(E)              |                          |
| 1370.707 | 1369.699 | 1369.724   | -0.025     | -18         | 106   | 116 | (R)SLYSEKEVFIR(E)                |                          |
| 2326.096 | 2325.088 | 2325.098   | -0.010     | -5          | 134   | 153 | (R)VCEGQVLPMEIHLQTDAEK(G)        | CAM-Cys (2)              |
| 2342.149 | 2341.141 | 2341.093   | 0.048      | 21          | 134   | 153 | (R)VCEGQVLPMEIHLQTDAEK(G)        | CAM-Cys (2), Met Ox (10) |
| 2718.414 | 2717.407 | 2717.427   | -0.021     | -8          | 154   | 179 | (K)GTITIQDTGIGMTKEELVSNLGTIAR(S) |                          |
| 1687.825 | 1686.817 | 1686.833   | -0.016     | -9          | 184   | 198 | (K)AFLEALQHQAEISSR(I)            |                          |
| 1328.555 | 1327.548 | 1327.546   | 0.001      | 1           | 261   | 271 | (K)SDCKDFANESR(V)                | CAM-Cys (3)              |
| 1676.826 | 1675.818 | 1675.836   | -0.018     | -11         | 279   | 292 | (K)YSNFVSFPLYLNGR(R)             |                          |
| 1716.863 | 1715.855 | 1715.885   | -0.030     | -18         | 293   | 306 | (R)RINTLQAIWMMDPK(D)             |                          |
| 1732.873 | 1731.865 | 1731.880   | -0.015     | -9          | 293   | 306 | (R)RINTLQAIWMMDPK(D)             | Met Ox                   |
| 1560.756 | 1559.748 | 1559.784   | -0.036     | -23         | 294   | 306 | (R)INTLQAIWMMDPK(D)              |                          |
| 1599.691 | 1598.683 | 1598.700   | -0.017     | -10         | 307   | 318 | (K)DISEFQHEEFYR(Y)               |                          |

|          |          |          |        |     |     |     |                             |             |
|----------|----------|----------|--------|-----|-----|-----|-----------------------------|-------------|
| 1224.615 | 1223.607 | 1223.630 | -0.022 | -18 | 319 | 328 | (R)YIAQAYDKPR(F)            |             |
| 2032.980 | 2031.972 | 2031.980 | -0.008 | -4  | 343 | 359 | (R)SIFYVPEMKPSMFDVSR(E)     |             |
| 2048.970 | 2047.962 | 2047.975 | -0.012 | -6  | 343 | 359 | (R)SIFYVPEMKPSMFDVSR(E)     | Met Ox      |
| 2064.935 | 2063.927 | 2063.970 | -0.042 | -20 | 343 | 359 | (R)SIFYVPEMKPSMFDVSR(E)     | 2 Met Ox    |
| 1513.760 | 1512.752 | 1512.778 | -0.027 | -18 | 391 | 404 | (R)GVVDESDIPLNLSR(E)        |             |
| 1171.639 | 1170.631 | 1170.661 | -0.030 | -25 | 405 | 414 | (R)ELLQESALIR(K)            |             |
| 1686.783 | 1685.775 | 1685.791 | -0.016 | -9  | 439 | 451 | (K)YAKFFEDYGLFMR(E)         |             |
| 1324.581 | 1323.574 | 1323.596 | -0.022 | -17 | 442 | 451 | (K)FFEDYGLFMR(E)            |             |
| 1340.578 | 1339.570 | 1339.591 | -0.021 | -15 | 442 | 451 | (K)FFEDYGLFMR(E)            | Met Ox (9)  |
| 1303.699 | 1302.691 | 1302.667 | 0.024  | 19  | 452 | 463 | (R)EGIVTTAEQDIK(E)          |             |
| 2116.003 | 2114.995 | 2115.012 | -0.017 | -8  | 472 | 491 | (R)YESSALPAGQLTSLSDYASR(M)  |             |
| 1283.605 | 1282.597 | 1282.613 | -0.015 | -12 | 498 | 507 | (R)NIYYLCAPNR(H)            | CAM-Cys (6) |
| 1575.712 | 1574.704 | 1574.719 | -0.015 | -9  | 508 | 520 | (R)HLAEHSPYYEAMK(Q)         |             |
| 1591.721 | 1590.713 | 1590.714 | -0.001 | 0   | 508 | 520 | (R)HLAEHSPYYEAMK(Q)         | Met Ox (12) |
| 2554.281 | 2553.273 | 2553.257 | 0.016  | 6   | 523 | 542 | (K)QTEVLFICYEQFDELTLHLR(E)  | CAM-Cys (7) |
| 2017.038 | 2016.030 | 2016.042 | -0.011 | -6  | 549 | 565 | (K)LISVETDIVVDHYKEEK(F)     |             |
| 1108.481 | 1107.473 | 1107.483 | -0.010 | -9  | 566 | 575 | (K)FEDTSPAGER(L)            |             |
| 1565.760 | 1564.753 | 1564.737 | 0.016  | 10  | 566 | 579 | (K)FEDTSPAGERLSEK(E)        |             |
| 1752.820 | 1751.812 | 1751.822 | -0.010 | -6  | 576 | 589 | (R)LSEKETEELMAWMR(N)        |             |
| 1768.800 | 1767.792 | 1767.817 | -0.025 | -14 | 576 | 589 | (R)LSEKETEELMAWMR(N)        | Met Ox      |
| 1295.564 | 1294.556 | 1294.569 | -0.013 | -10 | 580 | 589 | (K)ETEELMAWMR(N)            |             |
| 1811.909 | 1810.901 | 1810.907 | -0.006 | -3  | 605 | 621 | (R)LDTHPAMVTVLEMGAAR(H)     |             |
| 1827.899 | 1826.891 | 1826.902 | -0.011 | -6  | 605 | 621 | (R)LDTHPAMVTVLEMGAAR(H)     | Met Ox      |
| 2397.224 | 2396.216 | 2396.209 | 0.007  | 3   | 605 | 625 | (R)LDTHPAMVTVLEMGAARHFLR(M) | 2 Met Ox    |
| 1492.825 | 1491.817 | 1491.841 | -0.024 | -16 | 637 | 649 | (R)AQLLQPTLEINPR(H)         |             |

### No. 30 Catalase

| m/z      | Peak mW  | Peptide mW | Delta (Da) | Delta (ppm) | Start | End | Sequence                          | Modifications |
|----------|----------|------------|------------|-------------|-------|-----|-----------------------------------|---------------|
| 1320.585 | 1319.577 | 1319.578   | -0.001     | -1          | 1     | 12  | (-)ADSRDPASDQMK(Q)                |               |
| 2278.152 | 2277.144 | 2277.171   | -0.028     | -12         | 16    | 37  | (K)EQRAPQKPDVLTGGGNPIGDK(L)       |               |
| 2818.553 | 2817.545 | 2817.481   | 0.064      | 23          | 19    | 46  | (R)APQKPDVLTGGGNPIGDKLNIMTAGPR(G) |               |
| 972.517  | 971.509  | 971.522    | -0.014     | -14         | 38    | 46  | (K)LNIMTAGPR(G)                   |               |
| 988.491  | 987.483  | 987.517    | -0.034     | -35         | 38    | 46  | (K)LNIMTAGPR(G)                   | Met Ox (4)    |
| 2189.072 | 2188.064 | 2188.062   | 0.002      | 1           | 47    | 65  | (R)GPLLVQDVVFTDEMAHFDR(E)         |               |
| 2474.218 | 2473.210 | 2473.206   | 0.004      | 2           | 47    | 67  | (R)GPLLVQDVVFTDEMAHFDRER(I)       |               |

|          |          |          |        |     |     |     |                             |              |
|----------|----------|----------|--------|-----|-----|-----|-----------------------------|--------------|
| 1048.576 | 1047.568 | 1047.619 | -0.051 | -49 | 68  | 76  | (R)IPERVVHAK(G)             |              |
| 2275.163 | 2274.155 | 2274.155 | 0.000  | 0   | 72  | 92  | (R)VVHAKGAGAFGYFEVTHDITR(Y) |              |
| 1740.837 | 1739.829 | 1739.827 | 0.002  | 1   | 77  | 92  | (K)GAGAFGYFEVTHDITR(Y)      |              |
| 985.542  | 984.534  | 984.551  | -0.016 | -17 | 98  | 105 | (K)VFEHIGKR(T)              |              |
| 1483.681 | 1482.674 | 1482.695 | -0.022 | -15 | 112 | 126 | (R)FSTVAGESGSADTVR(D)       |              |
| 1851.901 | 1850.893 | 1850.876 | 0.017  | 9   | 112 | 129 | (R)FSTVAGESGSADTVRDPR(G)    |              |
| 2518.203 | 2517.196 | 2517.196 | -0.001 | 0   | 135 | 155 | (K)FYTEDGNWDLVGNNTPIFFIR(D) |              |
| 1520.742 | 1519.734 | 1519.749 | -0.015 | -10 | 156 | 168 | (R)DAMLFPSFIHSQK(R)         |              |
| 1676.839 | 1675.831 | 1675.851 | -0.019 | -12 | 156 | 169 | (R)DAMLFPSFIHSQKR(N)        |              |
| 1692.893 | 1691.885 | 1691.845 | 0.039  | 23  | 156 | 169 | (R)DAMLFPSFIHSQKR(N)        | Met Ox (3)   |
| 2010.949 | 2009.941 | 2009.928 | 0.013  | 7   | 203 | 220 | (R)GIPDGHHRMNGYGSHTFK(L)    |              |
| 1278.607 | 1277.600 | 1277.561 | 0.038  | 30  | 210 | 220 | (R)HMNGYGSHTFK(L)           |              |
| 1337.651 | 1336.643 | 1336.645 | -0.001 | -1  | 221 | 232 | (K)LVNANGEAVYCK(F)          | CAM-Cys (11) |
| 1912.946 | 1911.938 | 1911.930 | 0.008  | 4   | 221 | 236 | (K)LVNANGEAVYCKFHYK(T)      | CAM-Cys (11) |
| 984.499  | 983.492  | 983.504  | -0.012 | -12 | 243 | 251 | (K)NLPVEEAGR(L)             |              |
| 2242.172 | 2241.164 | 2241.102 | 0.062  | 27  | 243 | 262 | (K)NLPVEEAGRLAQEDPDYGLR(D)  |              |
| 1276.616 | 1275.609 | 1275.610 | -0.001 | -1  | 252 | 262 | (R)LAQEDPDYGLR(D)           |              |
| 1655.775 | 1654.767 | 1654.788 | -0.021 | -13 | 287 | 300 | (K)EAETFPFNPFDLTK(V)        |              |
| 2303.132 | 2302.124 | 2302.142 | -0.018 | -8  | 287 | 305 | (K)EAETFPFNPFDLTKVWPHK(D)   |              |
| 1648.921 | 1647.913 | 1647.914 | -0.001 | -1  | 301 | 314 | (K)VWPHKDYPLIPVGK(L)        |              |
| 2097.103 | 2096.095 | 2096.074 | 0.021  | 10  | 363 | 379 | (R)HRLGPNYLQIPVNCPYR(A)     | CAM-Cys (14) |
| 977.486  | 976.478  | 976.520  | -0.042 | -43 | 380 | 387 | (R)ARVANYQR(D)              |              |
| 1493.714 | 1492.706 | 1492.691 | 0.016  | 10  | 431 | 443 | (R)FNSANEDNVTQVR(T)         |              |
| 1016.532 | 1015.524 | 1015.530 | -0.006 | -6  | 449 | 456 | (K)VLNEEERK(R)              |              |



**Table 2S.** MALDI-ToF MS identification details for differentially expressed proteins in livers N, HFD and HFD+T2 rats using Mascot software (www.matrixscience.com). Spot numbers refer to Table 2.

| <b>No. 1 Glutamate dehydrogenase 1</b> |                 |                 |                 |              |             |                              |                      |
|----------------------------------------|-----------------|-----------------|-----------------|--------------|-------------|------------------------------|----------------------|
| <b>Start - End</b>                     | <b>Observed</b> | <b>Mr(expt)</b> | <b>Mr(calc)</b> | <b>Delta</b> | <b>Miss</b> | <b>Sequence</b>              | <b>Modifications</b> |
| 35 - 51                                | 1730.908        | 1729.900        | 1729.959        | -0.059       | 1           | R.GQPSAVPQPGLTPVARR.H        |                      |
| 52 - 60                                | 1049.434        | 1048.427        | 1048.457        | -0.031       | 0           | R.HYSEAATDR.E                |                      |
| 61 - 68                                | 1011.481        | 1010.473        | 1010.435        | 0.039        | 0           | R.EDDPNFFK.M                 |                      |
| 69 - 76                                | 1000.449        | 999.442         | 999.448         | -0.007       | 0           | K.MVEGFFDR.G                 |                      |
| 69 - 76                                | 1016.423        | 1015.416        | 1015.443        | -0.027       | 0           | K.MVEGFFDR.G                 | Oxidation (M)        |
| 91 - 98                                | 1033.485        | 1032.477        | 1032.484        | -0.006       | 1           | K.TRENEEQK.R                 |                      |
| 108 - 123                              | 1894.079        | 1893.072        | 1893.066        | 0.006        | 0           | R.IIKPCNHVLSLSFPIR.R         |                      |
| 108 - 124                              | 2050.144        | 2049.136        | 2049.167        | -0.031       | 1           | R.IIKPCNHVLSLSFPIRR.D        |                      |
| 124 - 136                              | 1581.735        | 1580.727        | 1580.722        | 0.005        | 1           | R.RDDGSWEVIEGYR.A            |                      |
| 125 - 136                              | 1425.620        | 1424.613        | 1424.621        | -0.008       | 0           | R.DDGSWEVIEGYR.A             |                      |
| 163 - 171                              | 997.505         | 996.497         | 996.531         | -0.034       | 0           | K.ALASLMTYK.C                |                      |
| 163 - 183                              | 2198.115        | 2197.107        | 2197.128        | -0.020       | 1           | K.ALASLMTYKCAVVDVPFGGAK.A    |                      |
| 172 - 183                              | 1219.533        | 1218.525        | 1218.607        | -0.082       | 0           | K.CAVVDVPFGGAK.A             |                      |
| 212 - 231                              | 2044.025        | 2043.017        | 2043.010        | 0.008        | 1           | K.KGFIGPGIDVPAPDMSTGER.E     |                      |
| 213 - 231                              | 1915.926        | 1914.919        | 1914.915        | 0.004        | 0           | K.GFIGPGIDVPAPDMSTGER.E      |                      |
| 303 - 318                              | 1748.893        | 1747.886        | 1747.883        | 0.003        | 0           | K.TFVVQGFQGNVGLHSMR.Y        |                      |
| 303 - 318                              | 1764.870        | 1763.863        | 1763.878        | -0.015       | 0           | K.TFVVQGFQGNVGLHSMR.Y        | Oxidation (M)        |
| 347 - 363                              | 1958.048        | 1957.041        | 1957.031        | 0.010        | 1           | K.ELEDFKLQHGSILGFPA.A        |                      |
| 353 - 363                              | 1196.648        | 1195.641        | 1195.671        | -0.030       | 0           | K.LQHGSILGFPA.A              |                      |
| 366 - 386                              | 2293.109        | 2292.101        | 2292.120        | -0.018       | 0           | K.VYEGSILEADCDILIPAASEK.Q    |                      |
| 400 - 420                              | 2242.172        | 2241.165        | 2241.164        | 0.001        | 1           | K.IIAEGANGPTTPEADKIFLER.N    |                      |
| 421 - 444                              | 2742.504        | 2741.496        | 2741.414        | 0.083        | 0           | R.NIMVIPDLYLNAGGVTVSYFEWLK.N |                      |
| 445 - 453                              | 1059.515        | 1058.508        | 1058.526        | -0.018       | 0           | K.NLNHVSYGR.L                |                      |
| 454 - 460                              | 956.509         | 955.502         | 955.513         | -0.011       | 1           | R.LTFKYER.D                  |                      |
| 458 - 476                              | 2369.209        | 2368.202        | 2368.112        | 0.090        | 1           | K.YERDSNYHLLMSVQESLER.K      |                      |
| 461 - 476                              | 1920.919        | 1919.912        | 1919.905        | 0.007        | 0           | R.DSNYHLLMSVQESLER.K         |                      |
| 478 - 496                              | 2056.040        | 2055.032        | 2055.054        | -0.022       | 1           | K.FGKHGGTIPVVPTAEFQDR.I      |                      |
| 481 - 496                              | 1723.869        | 1722.862        | 1722.869        | -0.007       | 0           | K.HGGTIPVVPTAEFQDR.I         |                      |

|           |          |          |          |        |   |                          |               |
|-----------|----------|----------|----------|--------|---|--------------------------|---------------|
| 497 - 516 | 2164.105 | 2163.097 | 2163.063 | 0.034  | 1 | R.ISGASEKDIVHSGLAYTMER.S |               |
| 504 - 516 | 1491.715 | 1490.708 | 1490.719 | -0.011 | 0 | K.DIVHSGLAYTMER.S        |               |
| 520 - 527 | 994.446  | 993.439  | 993.510  | -0.071 | 1 | R.QIMRTAMK.Y             | Oxidation (M) |
| 524 - 535 | 1394.728 | 1393.721 | 1393.739 | -0.018 | 1 | R.TAMKYNLGLDLR.T         |               |
| 528 - 535 | 963.511  | 962.503  | 962.519  | -0.015 | 0 | K.YNLGLDLR.T             |               |
| 536 - 545 | 1079.540 | 1078.533 | 1078.566 | -0.033 | 0 | R.TAAYVNAIEK.V           |               |

### No. 2 ATP synthase subunit alpha

| Start - End | Observed | Mr(expt) | Mr(calc) | Delta  | Miss | Sequence                     | Modifications |
|-------------|----------|----------|----------|--------|------|------------------------------|---------------|
| 24 - 34     | 1108.484 | 1107.477 | 1107.567 | -0.091 | 0    | K.NALGSSFVGTR.N              |               |
| 232 - 239   | 925.326  | 924.319  | 924.383  | -0.064 | 0    | R.FNDGTDEK.K                 |               |
| 262 - 270   | 1020.494 | 1019.487 | 1019.507 | -0.020 | 1    | K.RLTDADAMK.Y                |               |
| 306 - 316   | 1287.670 | 1286.663 | 1286.687 | -0.024 | 0    | K.HALIIYDDLSK.Q              |               |
| 335 - 347   | 1553.759 | 1552.752 | 1552.731 | 0.021  | 0    | R.EAYPGDVFLHSR.L             |               |
| 428 - 441   | 1607.773 | 1606.766 | 1606.850 | -0.084 | 1    | K.QVAGTMKLELAQYR.E           |               |
| 442 - 463   | 2338.148 | 2337.141 | 2337.160 | -0.019 | 0    | R.EVAFAAQFGSDLDAATQQLSR.G    |               |
| 473 - 493   | 2309.140 | 2308.132 | 2308.152 | -0.020 | 0    | K.QGQYSPMAIEEQVAVIYAGVR.G    |               |
| 504 - 527   | 2711.441 | 2710.434 | 2710.456 | -0.022 | 1    | K.ITKFESAFLSHVVSQHQSSLGNIR.S |               |
| 507 - 527   | 2369.210 | 2368.202 | 2368.229 | -0.026 | 0    | K.FESAFLSHVVSQHQSSLGNIR.S    |               |
| 540 - 553   | 1577.819 | 1576.812 | 1576.850 | -0.038 | 1    | K.LKEIVTNFLAGFEP.-           |               |

### No. 3 Carnitine O-palmitoyltransferase 2

| Start - End | Observed | Mr(expt) | Mr(calc) | Delta  | Miss | Sequence                | Modifications |
|-------------|----------|----------|----------|--------|------|-------------------------|---------------|
| 1 - 8       | 1063.586 | 1062.579 | 1062.583 | -0.004 | 1    | -.MMPRLLFR.A            |               |
| 2 - 8       | 932.582  | 931.575  | 931.543  | 0.032  | 1    | M.MPRLLFR.A             |               |
| 64 - 78     | 1807.960 | 1806.953 | 1806.926 | 0.026  | 0    | R.YLNAQKPLLDDSQFR.R     |               |
| 64 - 79     | 1964.046 | 1963.039 | 1963.028 | 0.011  | 1    | R.YLNAQKPLLDDSQFRR.T    |               |
| 80 - 93     | 1553.680 | 1552.673 | 1552.756 | -0.083 | 1    | R.TEALCKNFETGVGK.E      |               |
| 94 - 104    | 1274.611 | 1273.604 | 1273.678 | -0.074 | 0    | K.ELHAHLLAQDK.Q         |               |
| 105 - 124   | 2415.234 | 2414.227 | 2414.148 | 0.079  | 1    | K.QNKHTSYISGPWFDMYLAR.D |               |
| 108 - 124   | 2044.989 | 2043.982 | 2043.951 | 0.030  | 0    | K.HTSYISGPWFDMYLAR.D    |               |
| 125 - 142   | 2066.000 | 2064.993 | 2064.998 | -0.005 | 0    | R.DSIVLNFNPFMAFNPK.S    |               |
| 143 - 151   | 1125.521 | 1124.514 | 1124.510 | 0.004  | 0    | K.SEYNDQLTR.A           |               |

|           |          |          |          |        |   |                             |  |
|-----------|----------|----------|----------|--------|---|-----------------------------|--|
| 152 - 161 | 1031.593 | 1030.586 | 1030.577 | 0.009  | 0 | R.ATNLTVSAVR.F              |  |
| 165 - 182 | 1993.066 | 1992.059 | 1992.068 | -0.010 | 0 | K.TLQAGLLEPEVFHNLNPSK.S     |  |
| 183 - 190 | 939.450  | 938.443  | 938.446  | -0.003 | 1 | K.SDTDAFKR.L                |  |
| 226 - 239 | 1701.896 | 1700.888 | 1700.885 | 0.004  | 1 | R.IPRPNRDELFTDTK.A          |  |
| 232 - 239 | 968.360  | 967.353  | 967.450  | -0.097 | 0 | R.DELFTDTK.A                |  |
| 275 - 296 | 2484.242 | 2483.234 | 2483.222 | 0.012  | 0 | K.YILSDSSPVPEFPVAYLTSEN.R.D |  |
| 297 - 305 | 1144.659 | 1143.652 | 1143.604 | 0.049  | 1 | R.DVWAE LRQK.L              |  |
| 306 - 316 | 1278.633 | 1277.626 | 1277.650 | -0.025 | 0 | K.LIFDGN EETLK.K            |  |
| 432 - 439 | 967.481  | 966.473  | 966.502  | -0.029 | 1 | K.EKFDTTVK.T                |  |
| 434 - 450 | 1999.019 | 1998.012 | 1998.042 | -0.030 | 1 | K.FDTTVKTL SIDS IQFQR.G     |  |
| 440 - 450 | 1307.650 | 1306.643 | 1306.688 | -0.045 | 0 | K.TLSIDS IQFQR.G            |  |
| 440 - 453 | 1549.813 | 1548.806 | 1548.826 | -0.020 | 1 | K.TLSIDS IQFQRGGK.E         |  |
| 499 - 511 | 1519.844 | 1518.837 | 1518.852 | -0.015 | 1 | R.TETIRPASIFTKR.C           |  |
| 511 - 518 | 1024.495 | 1023.487 | 1023.492 | -0.005 | 1 | K.RCSEAFVR.D                |  |
| 519 - 537 | 2171.054 | 2170.047 | 2169.961 | 0.086  | 1 | R.DPSKHSV GELQHMM AECSK.Y   |  |
| 632 - 642 | 1401.709 | 1400.702 | 1400.698 | 0.003  | 1 | R.NAREFLHCVQK.C             |  |
| 643 - 654 | 1409.639 | 1408.632 | 1408.654 | -0.023 | 0 | K.CLEDIFDALEGK.A            |  |

#### No. 4 Purine nucleoside phosphorylase

| Start - End | Observed | Mr(expt) | Mr(calc) | Delta  | Miss | Sequence                      | Modifications |
|-------------|----------|----------|----------|--------|------|-------------------------------|---------------|
| 2 - 12      | 1493.613 | 1492.606 | 1492.611 | -0.005 | 0    | M.ENEFTYEDYQR.T               |               |
| 68 - 76     | 1022.545 | 1021.538 | 1021.571 | -0.033 | 0    | R.LVFGFLNGR.S                 |               |
| 68 - 84     | 1987.982 | 1986.975 | 1986.959 | 0.016  | 1    | R.LVFGFLNGRSCVMMQGR.F         | Oxidation (M) |
| 77 - 84     | 968.386  | 967.379  | 967.404  | -0.025 | 0    | R.SCVMMQGR.F                  |               |
| 77 - 84     | 984.324  | 983.317  | 983.399  | -0.082 | 0    | R.SCVMMQGR.F                  | Oxidation (M) |
| 85 - 95     | 1361.575 | 1360.568 | 1360.612 | -0.044 | 0    | R.FHMYEGYLSK.V                |               |
| 124 - 133   | 1192.621 | 1191.614 | 1191.632 | -0.018 | 0    | K.FEVGDIMLIR.D                |               |
| 124 - 133   | 1208.573 | 1207.566 | 1207.627 | -0.061 | 0    | K.FEVGDIMLIR.D                | Oxidation (M) |
| 134 - 148   | 1737.861 | 1736.853 | 1736.842 | 0.012  | 0    | R.DHINLPGFCGQNPLR.G           |               |
| 159 - 168   | 1172.543 | 1171.535 | 1171.497 | 0.039  | 0    | R.FPAMSDAYDR.D                |               |
| 159 - 171   | 1574.652 | 1573.645 | 1573.665 | -0.021 | 1    | R.FPAMSDAYDRDMR.Q             |               |
| 172 - 179   | 992.538  | 991.531  | 991.524  | 0.007  | 1    | R.QKAFNAWK.Q                  |               |
| 174 - 185   | 1465.681 | 1464.673 | 1464.693 | -0.020 | 1    | K.AFNAWKQMGEQR.E              |               |
| 186 - 210   | 2802.407 | 2801.400 | 2801.325 | 0.075  | 0    | R.ELQEGTYIMSAGPTFETVAESCLLR.M |               |
| 211 - 229   | 1916.021 | 1915.013 | 1914.991 | 0.023  | 0    | R.MLGADAVGMSTVPEVIVAR.H       |               |

|           |          |          |          |        |   |                          |               |
|-----------|----------|----------|----------|--------|---|--------------------------|---------------|
| 230 - 244 | 1748.905 | 1747.898 | 1747.919 | -0.021 | 1 | R.HCGLRVFGFSLITNK.V      |               |
| 245 - 254 | 1240.627 | 1239.620 | 1239.581 | 0.040  | 0 | K.VVMDYNNLEK.A           | Oxidation (M) |
| 255 - 265 | 1168.594 | 1167.586 | 1167.588 | -0.002 | 0 | K.ASHQEVLKAGK.A          |               |
| 266 - 285 | 2228.212 | 2227.205 | 2227.203 | 0.001  | 1 | K.AAAQKLEQFVSILMESIPPR.E |               |
| 266 - 285 | 2244.188 | 2243.180 | 2243.198 | -0.018 | 1 | K.AAAQKLEQFVSILMESIPPR.E | Oxidation (M) |
| 271 - 285 | 1758.953 | 1757.946 | 1757.939 | 0.007  | 0 | K.LEQFVSILMESIPPR.E      |               |
| 271 - 285 | 1774.933 | 1773.926 | 1773.934 | -0.008 | 0 | K.LEQFVSILMESIPPR.E      | Oxidation (M) |
| 271 - 287 | 2044.079 | 2043.071 | 2043.082 | -0.011 | 1 | K.LEQFVSILMESIPPRER.A    |               |

### No. 5 Sulfotransferase 1A1

| Start - End | Observed | Mr(expt) | Mr(calc) | Delta  | Miss | Sequence                 | Modifications |
|-------------|----------|----------|----------|--------|------|--------------------------|---------------|
| 1 - 12      | 1439.787 | 1438.780 | 1438.776 | 0.005  | 0    | -.MEFSRPPLVHVK.G         |               |
| 45 - 65     | 2387.154 | 2386.146 | 2386.155 | -0.009 | 1    | K.SGTTWMSEILDMIYQGKLEK.C |               |
| 82 - 99     | 1909.921 | 1908.914 | 1908.925 | -0.012 | 0    | K.CPGVPSGLETLEETPAPR.L   |               |
| 103 - 118   | 1803.024 | 1802.017 | 1802.030 | -0.013 | 0    | K.THLPLSLLPQSLLDQK.V     |               |
| 174 - 179   | 918.433  | 917.425  | 917.440  | -0.014 | 0    | K.EWWELR.H               |               |
| 180 - 193   | 1774.895 | 1773.888 | 1773.909 | -0.022 | 0    | R.HTHPVLYLFYEDIK.E       |               |
| 180 - 197   | 2243.156 | 2242.148 | 2242.142 | 0.006  | 1    | R.HTHPVLYLFYEDIKENPK.R   |               |
| 202 - 209   | 975.553  | 974.546  | 974.591  | -0.046 | 1    | K.KILEFLGR.S             |               |
| 210 - 226   | 1925.940 | 1924.933 | 1924.953 | -0.020 | 0    | R.SLPEETVDSIVHHTSFK.K    |               |
| 255 - 271   | 1924.914 | 1923.907 | 1923.908 | -0.001 | 1    | K.GTTGDWKNFTVAQNER.F     |               |
| 262 - 271   | 1179.570 | 1178.563 | 1178.568 | -0.005 | 0    | K.NFTVAQNER.F            |               |

### No. 6 Hydroxymethylglutaryl-CoA synthase

| Start - End | Observed | Mr(expt) | Mr(calc) | Delta  | Miss | Sequence                    | Modifications |
|-------------|----------|----------|----------|--------|------|-----------------------------|---------------|
| 1 - 9       | 1055.472 | 1054.465 | 1054.607 | -0.142 | 1    | -.MQRLLAPAR.R               |               |
| 36 - 46     | 1141.676 | 1140.669 | 1140.654 | 0.014  | 0    | R.FSTIPPAPLAK.T             |               |
| 53 - 75     | 2626.363 | 2625.356 | 2625.321 | 0.034  | 0    | K.DVGILALEVYFPAQYVDQTDLEK.F |               |
| 84 - 92     | 994.527  | 993.520  | 993.524  | -0.004 | 0    | K.YTVGLGQTR.M               |               |
| 93 - 112    | 2356.118 | 2355.111 | 2355.102 | 0.009  | 0    | R.MGFCSVQEDINSLCLTVVQR.L    |               |
| 117 - 126   | 1142.598 | 1141.591 | 1141.624 | -0.033 | 1    | R.TKLPWDAVGR.L              |               |
| 119 - 126   | 913.562  | 912.555  | 912.482  | 0.073  | 0    | K.LPWDAVGR.L                |               |
| 127 - 137   | 1217.615 | 1216.608 | 1216.655 | -0.047 | 0    | R.LEVGTETIIDK.S             |               |

|           |          |          |          |        |   |                               |
|-----------|----------|----------|----------|--------|---|-------------------------------|
| 127 - 139 | 1432.724 | 1431.717 | 1431.782 | -0.065 | 1 | R.LEVGTETIIDKSK.A             |
| 222 - 231 | 1095.658 | 1094.650 | 1094.645 | 0.005  | 0 | K.APLVLEQGLR.G                |
| 232 - 256 | 2859.478 | 2858.471 | 2858.322 | 0.148  | 0 | R.GTHMENAYDFYKPNLASEYPLVDGK.L |
| 257 - 264 | 1052.574 | 1051.566 | 1051.548 | 0.018  | 0 | K.LSIQCYLR.A                  |
| 269 - 275 | 959.464  | 958.457  | 958.444  | 0.012  | 1 | R.CYAAAYRR.K                  |
| 276 - 282 | 944.343  | 943.336  | 943.524  | -0.188 | 1 | R.KIQNQWK.Q                   |
| 283 - 306 | 2871.473 | 2870.466 | 2870.316 | 0.150  | 0 | K.QAGNNQPFTLDDVQYMIFHTPFCK.M  |
| 307 - 314 | 932.510  | 931.502  | 931.527  | -0.025 | 1 | K.MVQKSLAR.L                  |
| 315 - 333 | 2251.094 | 2250.087 | 2250.063 | 0.024  | 1 | R.LMFNDFLSSSSDKQNNLYK.G       |
| 343 - 350 | 997.579  | 996.572  | 996.476  | 0.096  | 0 | K.LEETYTNK.D                  |
| 351 - 358 | 901.411  | 900.403  | 900.528  | -0.125 | 1 | K.DVDKALLK.A                  |
| 359 - 366 | 925.428  | 924.421  | 924.438  | -0.017 | 0 | K.ASLDMFNK.K                  |
| 407 - 424 | 1885.007 | 1884.000 | 1883.921 | 0.079  | 0 | R.IGAFSYGSGLAASFFSFR.V        |
| 428 - 437 | 1000.532 | 999.525  | 999.487  | 0.038  | 0 | K.DASPGSPLEK.L                |
| 474 - 494 | 2397.344 | 2396.337 | 2396.144 | 0.193  | 0 | K.VNFSPPGDTSNLFPGTWYLER.V     |
| 495 - 501 | 942.606  | 941.599  | 941.450  | 0.149  | 1 | R.VDEMHRK.K                   |

#### No. 7 Hydroxymethylglutaryl-CoA synthase

| Start - End | Observed | Mr(expt) | Mr(calc) | Delta  | Miss | Sequence                    | Modifications |
|-------------|----------|----------|----------|--------|------|-----------------------------|---------------|
| 53 - 75     | 2626.347 | 2625.340 | 2625.321 | 0.019  | 0    | K.DVGILALEVYFPAQYVDQTDLEK.F |               |
| 76 - 92     | 1853.910 | 1852.902 | 1852.943 | -0.041 | 1    | K.FNNVEAGKYTVGLGQTR.M       |               |
| 84 - 92     | 994.502  | 993.495  | 993.524  | -0.029 | 0    | K.YTVGLGQTR.M               |               |
| 93 - 112    | 2356.102 | 2355.095 | 2355.102 | -0.007 | 0    | R.MGFCSVQEDINSLCLTVVQR.L    |               |
| 117 - 126   | 1142.600 | 1141.592 | 1141.624 | -0.032 | 1    | R.TKLPWDAVGR.L              |               |
| 119 - 126   | 913.464  | 912.456  | 912.482  | -0.026 | 0    | K.LPWDAVGR.L                |               |
| 222 - 231   | 1095.616 | 1094.608 | 1094.645 | -0.037 | 0    | K.APLVLEQGLR.G              |               |
| 257 - 264   | 1052.523 | 1051.516 | 1051.548 | -0.033 | 0    | K.LSIQCYLR.A                |               |
| 269 - 275   | 959.455  | 958.448  | 958.444  | 0.003  | 1    | R.CYAAAYRR.K                |               |
| 276 - 282   | 944.484  | 943.477  | 943.524  | -0.047 | 1    | R.KIQNQWK.Q                 |               |
| 315 - 327   | 1490.650 | 1489.643 | 1489.676 | -0.033 | 0    | R.LMFNDFLSSSSDK.Q           |               |
| 315 - 333   | 2251.095 | 2250.088 | 2250.063 | 0.025  | 1    | R.LMFNDFLSSSSDKQNNLYK.G     |               |
| 343 - 350   | 997.452  | 996.445  | 996.476  | -0.032 | 0    | K.LEETYTNK.D                |               |
| 359 - 366   | 925.435  | 924.428  | 924.438  | -0.010 | 0    | K.ASLDMFNK.K                |               |
| 359 - 367   | 1053.522 | 1052.514 | 1052.532 | -0.018 | 1    | K.ASLDMFNKK.T               |               |

---

**No. 8 Ornithine aminotransferase**

| <b>Start - End</b> | <b>Observed</b> | <b>Mr(expt)</b> | <b>Mr(calc)</b> | <b>Delta</b> | <b>Miss</b> | <b>Sequence</b>                | <b>Modifications</b> |
|--------------------|-----------------|-----------------|-----------------|--------------|-------------|--------------------------------|----------------------|
| 32 - 46            | 1767.867        | 1766.859        | 1766.848        | 0.012        | 1           | K.KTEQGPPSSEYIFER.E            |                      |
| 33 - 46            | 1639.857        | 1638.849        | 1638.753        | 0.097        | 0           | K.TEQGPPSSEYIFER.E             |                      |
| 50 - 64            | 1736.880        | 1735.873        | 1735.879        | -0.006       | 0           | K.YGAHNYHPLPVALER.G            |                      |
| 65 - 76            | 1410.698        | 1409.691        | 1409.676        | 0.015        | 1           | R.GKGIYMWDVEGR.Q               |                      |
| 67 - 76            | 1225.559        | 1224.552        | 1224.560        | -0.008       | 0           | K.GIYMWDVEGR.Q                 |                      |
| 67 - 76            | 1241.576        | 1240.569        | 1240.555        | 0.014        | 0           | K.GIYMWDVEGR.Q                 | Oxidation (M)        |
| 77 - 96            | 2312.063        | 2311.056        | 2311.048        | 0.008        | 0           | R.QYDFLSAYGAVSQGHCHKP.I        |                      |
| 97 - 107           | 1277.680        | 1276.673        | 1276.670        | 0.003        | 1           | K.IIEAMKSQVDK.L                | Oxidation (M)        |
| 103 - 113          | 1247.645        | 1246.638        | 1246.688        | -0.051       | 1           | K.SQVDKLTLSR.A                 |                      |
| 114 - 129          | 1952.934        | 1951.927        | 1951.920        | 0.007        | 0           | R.AFYNNVLGEYEEYITK.L           |                      |
| 155 - 161          | 909.467         | 908.460         | 908.487         | -0.027       | 1           | R.RWGYTVK.G                    |                      |
| 156 - 165          | 1179.569        | 1178.561        | 1178.645        | -0.084       | 1           | R.WGYTVKGIQK.Y                 |                      |
| 168 - 180          | 1464.768        | 1463.761        | 1463.804        | -0.043       | 1           | K.AKIVFAVGNFWGR.T              |                      |
| 170 - 180          | 1265.666        | 1264.659        | 1264.672        | -0.013       | 0           | K.IVFAVGNFWGR.T                |                      |
| 256 - 271          | 1810.974        | 1809.967        | 1809.974        | -0.007       | 0           | R.HQVLFIADEIQTGLAR.T           |                      |
| 275 - 292          | 2074.145        | 2073.138        | 2073.137        | 0.001        | 0           | R.WLAVDHENVRPDIVLLGK.A         |                      |
| 332 - 351          | 2178.119        | 2177.112        | 2177.122        | -0.010       | 0           | R.IAIAALEVLEEEHLAENADK.M       |                      |
| 332 - 357          | 2819.562        | 2818.554        | 2818.490        | 0.064        | 1           | R.IAIAALEVLEEEHLAENADKMGAILR.K |                      |
| 363 - 372          | 1056.584        | 1055.576        | 1055.598        | -0.021       | 0           | K.LPSDVVTAVR.G                 |                      |
| 373 - 383          | 1153.711        | 1152.704        | 1152.734        | -0.030       | 1           | R.GKGLLNAIVIR.E                |                      |
| 375 - 383          | 968.605         | 967.598         | 967.618         | -0.020       | 0           | K.GLLNAIVIR.E                  |                      |
| 397 - 413          | 1889.053        | 1888.045        | 1888.064        | -0.019       | 1           | R.LRDNGLLAKPTHGDIIR.L          |                      |
| 399 - 413          | 1619.862        | 1618.854        | 1618.879        | -0.025       | 0           | R.DNGLLAKPTHGDIIR.L            |                      |
| 414 - 426          | 1492.866        | 1491.859        | 1491.866        | -0.007       | 1           | R.LAPPLVIKEDEIR.E              |                      |

---

**No. 9 Heat shock protein 75 kDa**

| <b>Start - End</b> | <b>Observed</b> | <b>Mr(expt)</b> | <b>Mr(calc)</b> | <b>Delta</b> | <b>Miss</b> | <b>Sequence</b>   | <b>Modifications</b> |
|--------------------|-----------------|-----------------|-----------------|--------------|-------------|-------------------|----------------------|
| 90 - 97            | 989.511         | 988.504         | 988.461         | 0.042        | 0           | K.HEFQAETK.K      |                      |
| 90 - 98            | 1117.478        | 1116.471        | 1116.556        | -0.085       | 1           | K.HEFQAETKK.L     |                      |
| 98 - 105           | 927.570         | 926.562         | 926.591         | -0.029       | 1           | K.KLLDIVAR.S      |                      |
| 99 - 111           | 1506.791        | 1505.784        | 1505.845        | -0.062       | 1           | K.LLDIVARSLYSEK.E |                      |

|           |          |          |          |        |   |                                |                 |
|-----------|----------|----------|----------|--------|---|--------------------------------|-----------------|
| 106 - 116 | 1370.707 | 1369.699 | 1369.724 | -0.025 | 1 | R.SLYSEKEVFIR.E                |                 |
| 117 - 130 | 1558.755 | 1557.748 | 1557.836 | -0.089 | 1 | R.ELISNASDALEKLR.H             |                 |
| 134 - 153 | 2326.096 | 2325.088 | 2325.098 | -0.010 | 0 | R.VCEGQVLPMEIHLQTDAEK.G        |                 |
| 134 - 153 | 2342.149 | 2341.142 | 2341.093 | 0.049  | 0 | R.VCEGQVLPMEIHLQTDAEK.G        | Oxidation (M)   |
| 154 - 179 | 2718.414 | 2717.407 | 2717.427 | -0.020 | 1 | K.GTITIQDTGIGMTKEELVSNLGTIAR.S |                 |
| 168 - 179 | 1301.631 | 1300.623 | 1300.699 | -0.075 | 0 | K.EELVSNLGTIAR.S               |                 |
| 184 - 198 | 1687.825 | 1686.818 | 1686.833 | -0.015 | 0 | K.AFLEALQHQETSSR.I             |                 |
| 261 - 271 | 1328.555 | 1327.548 | 1327.546 | 0.002  | 1 | K.SDCKDFANESR.V                |                 |
| 279 - 292 | 1676.826 | 1675.819 | 1675.836 | -0.017 | 0 | K.YSNFVSFPLYLNGR.R             |                 |
| 293 - 306 | 1716.863 | 1715.856 | 1715.885 | -0.029 | 1 | R.RINTLQAIWMMDPK.D             |                 |
| 293 - 306 | 1732.873 | 1731.865 | 1731.880 | -0.015 | 1 | R.RINTLQAIWMMDPK.D             | Oxidation (M)   |
| 294 - 306 | 1560.756 | 1559.749 | 1559.784 | -0.035 | 0 | R.INTLQAIWMMDPK.D              |                 |
| 307 - 318 | 1599.691 | 1598.684 | 1598.700 | -0.016 | 0 | K.DISEFQHEEFYR.Y               |                 |
| 319 - 328 | 1224.615 | 1223.608 | 1223.630 | -0.022 | 0 | R.YIAQAYDKPR.F                 |                 |
| 329 - 342 | 1700.853 | 1699.846 | 1699.941 | -0.095 | 1 | R.FILHYKTDAPLNIR.S             |                 |
| 343 - 359 | 2032.980 | 2031.972 | 2031.980 | -0.008 | 0 | R.SIFYVPEMKPSMFDVSR.E          |                 |
| 343 - 359 | 2048.970 | 2047.963 | 2047.975 | -0.012 | 0 | R.SIFYVPEMKPSMFDVSR.E          | Oxidation (M)   |
| 343 - 359 | 2064.935 | 2063.928 | 2063.970 | -0.042 | 0 | R.SIFYVPEMKPSMFDVSR.E          | 2 Oxidation (M) |
| 391 - 404 | 1513.760 | 1512.752 | 1512.778 | -0.026 | 0 | R.GVVDSEDIPLNLSR.E             |                 |
| 405 - 414 | 1171.639 | 1170.632 | 1170.661 | -0.029 | 0 | R.ELLQESALIR.K                 |                 |
| 427 - 434 | 1012.492 | 1011.485 | 1011.539 | -0.054 | 1 | K.FFIDQSKK.D                   |                 |
| 439 - 451 | 1686.783 | 1685.776 | 1685.791 | -0.016 | 1 | K.YAKFFEDYGLFMR.E              |                 |
| 442 - 451 | 1324.581 | 1323.574 | 1323.596 | -0.022 | 0 | K.FFEDYGLFMR.E                 |                 |
| 442 - 451 | 1340.578 | 1339.571 | 1339.591 | -0.020 | 0 | K.FFEDYGLFMR.E                 | Oxidation (M)   |
| 452 - 463 | 1303.699 | 1302.692 | 1302.667 | 0.025  | 0 | R.EGIVTTAEQDIK.E               |                 |
| 472 - 491 | 2116.003 | 2114.995 | 2115.012 | -0.017 | 0 | R.YESSALPAGQLTSLSDYASR.M       |                 |
| 498 - 507 | 1283.605 | 1282.598 | 1282.613 | -0.015 | 0 | R.NIYYLCAPNR.H                 |                 |
| 508 - 520 | 1575.712 | 1574.705 | 1574.719 | -0.014 | 0 | R.HLAEHSPYYEAMK.Q              |                 |
| 508 - 520 | 1591.721 | 1590.714 | 1590.714 | 0.000  | 0 | R.HLAEHSPYYEAMK.Q              | Oxidation (M)   |
| 523 - 542 | 2554.281 | 2553.274 | 2553.257 | 0.016  | 0 | K.QTEVLFCYEQFDELTLHLR.E        |                 |
| 549 - 565 | 2017.038 | 2016.031 | 2016.042 | -0.011 | 1 | K.LISVETDIVVDHYKEEK.F          |                 |
| 566 - 575 | 1108.481 | 1107.474 | 1107.483 | -0.010 | 0 | K.FEDTSPAGER.L                 |                 |
| 566 - 579 | 1565.760 | 1564.753 | 1564.737 | 0.016  | 1 | K.FEDTSPAGERLSEK.E             |                 |
| 576 - 589 | 1752.820 | 1751.813 | 1751.822 | -0.009 | 1 | R.LSEKETEELMAWMR.N             |                 |
| 576 - 589 | 1768.800 | 1767.793 | 1767.817 | -0.025 | 1 | R.LSEKETEELMAWMR.N             | Oxidation (M)   |
| 580 - 589 | 1295.564 | 1294.556 | 1294.569 | -0.012 | 0 | K.ETEELMAWMR.N                 |                 |
| 605 - 621 | 1811.909 | 1810.902 | 1810.907 | -0.005 | 0 | R.LDTHPAMVTVLEMGAAR.H          |                 |

|           |          |          |          |        |   |                           |                 |
|-----------|----------|----------|----------|--------|---|---------------------------|-----------------|
| 605 - 621 | 1827.899 | 1826.892 | 1826.902 | -0.010 | 0 | R.LDTHPAMVTVLEMGAAR.H     | Oxidation (M)   |
| 605 - 625 | 2397.224 | 2396.217 | 2396.209 | 0.008  | 1 | R.LDTHPAMVTVLEMGAARHFLR.M | 2 Oxidation (M) |
| 626 - 636 | 1361.758 | 1360.751 | 1360.677 | 0.074  | 1 | R.MQQLAKTQEER.A           |                 |
| 637 - 649 | 1492.825 | 1491.817 | 1491.841 | -0.024 | 0 | R.AQLLQPTLEINPR.H         |                 |

### No. 30 Catalase

| Start - End | Observed | Mr(expt) | Mr(calc) | Delta  | Miss | Sequence                        | Modifications |
|-------------|----------|----------|----------|--------|------|---------------------------------|---------------|
| 2 - 13      | 1320.585 | 1319.577 | 1319.578 | 0.000  | 1    | M.ADSRDPASDQMK.Q                |               |
| 6 - 13      | 907.313  | 906.305  | 906.375  | -0.070 | 0    | R.DPASDQMK.Q                    | Oxidation (M) |
| 17 - 38     | 2278.152 | 2277.144 | 2277.171 | -0.027 | 1    | K.EQRAPQKPDVLTGGGNPIGDK.L       |               |
| 20 - 47     | 2818.553 | 2817.545 | 2817.481 | 0.065  | 1    | R.APQKPDVLTGGGNPIGDKLNIMTAGPR.G |               |
| 39 - 47     | 972.517  | 971.509  | 971.522  | -0.013 | 0    | K.LNIMTAGPR.G                   |               |
| 39 - 47     | 988.491  | 987.483  | 987.517  | -0.034 | 0    | K.LNIMTAGPR.G                   | Oxidation (M) |
| 48 - 66     | 2189.072 | 2188.065 | 2188.062 | 0.002  | 0    | R.GPLLVQDVVFTDEMAHFDR.E         |               |
| 48 - 68     | 2474.218 | 2473.211 | 2473.206 | 0.005  | 1    | R.GPLLVQDVVFTDEMAHFDRER.I       |               |
| 69 - 77     | 1048.576 | 1047.568 | 1047.619 | -0.051 | 1    | R.IPERVVHAK.G                   |               |
| 73 - 93     | 2275.163 | 2274.155 | 2274.155 | 0.001  | 1    | R.VVHAKGAGAFGYFEVTHDITR.Y       |               |
| 78 - 93     | 1740.837 | 1739.830 | 1739.827 | 0.003  | 0    | K.GAGAFGYFEVTHDITR.Y            |               |
| 99 - 106    | 985.542  | 984.535  | 984.551  | -0.016 | 1    | K.VFEHIGKR.T                    |               |
| 113 - 127   | 1483.681 | 1482.674 | 1482.695 | -0.021 | 0    | R.FSTVAGESGSADTVR.D             |               |
| 113 - 130   | 1851.901 | 1850.894 | 1850.876 | 0.018  | 1    | R.FSTVAGESGSADTVRDPR.G          |               |
| 136 - 156   | 2518.203 | 2517.196 | 2517.197 | 0.000  | 0    | K.FYTEDGNWDLVGNNTPIFFIR.D       |               |
| 157 - 169   | 1520.742 | 1519.735 | 1519.749 | -0.015 | 0    | R.DAMLFPSFIHSQK.R               |               |
| 157 - 170   | 1676.839 | 1675.832 | 1675.850 | -0.019 | 1    | R.DAMLFPSFIHSQKR.N              |               |
| 157 - 170   | 1692.893 | 1691.885 | 1691.845 | 0.040  | 1    | R.DAMLFPSFIHSQKR.N              | Oxidation (M) |
| 170 - 177   | 993.479  | 992.472  | 992.552  | -0.080 | 1    | K.RNPQTHLK.D                    |               |
| 204 - 221   | 2010.949 | 2009.942 | 2009.928 | 0.014  | 1    | R.GIPDGHRHMNGYGSHTFK.L          |               |
| 211 - 221   | 1278.607 | 1277.600 | 1277.561 | 0.039  | 0    | R.HMNGYGSHTFK.L                 |               |
| 222 - 233   | 1337.651 | 1336.644 | 1336.645 | -0.001 | 0    | K.LVNANGEAVYCK.F                |               |
| 222 - 237   | 1912.946 | 1911.939 | 1911.930 | 0.009  | 1    | K.LVNANGEAVYCKFHYK.T            |               |
| 244 - 252   | 984.499  | 983.492  | 983.504  | -0.012 | 0    | K.NLPVEEAGR.L                   |               |
| 244 - 263   | 2242.172 | 2241.164 | 2241.103 | 0.062  | 1    | K.NLPVEEAGRLAQEDPDYGLR.D        |               |
| 253 - 263   | 1276.616 | 1275.609 | 1275.610 | -0.001 | 0    | R.LAQEDPDYGLR.D                 |               |
| 288 - 301   | 1655.775 | 1654.767 | 1654.788 | -0.021 | 0    | K.EAETFPFNPFDLTK.V              |               |
| 288 - 306   | 2303.132 | 2302.125 | 2302.142 | -0.018 | 1    | K.EAETFPFNPFDLTKVWPHK.D         |               |



---

|           |          |          |          |        |   |                       |
|-----------|----------|----------|----------|--------|---|-----------------------|
| 302 - 315 | 1648.921 | 1647.913 | 1647.914 | -0.001 | 1 | K.VWPHKDYPLIPVGK.L    |
| 355 - 363 | 1119.652 | 1118.645 | 1118.551 | 0.094  | 0 | R.LFAYPDTHR.H         |
| 364 - 380 | 2097.103 | 2096.096 | 2096.074 | 0.022  | 1 | R.HRLGPNYLQIPVNCPYR.A |
| 381 - 388 | 977.486  | 976.479  | 976.520  | -0.041 | 1 | R.ARVANYQR.D          |
| 432 - 444 | 1493.714 | 1492.707 | 1492.691 | 0.016  | 0 | R.FNSANEDNVTQVR.T     |
| 450 - 457 | 1016.532 | 1015.524 | 1015.530 | -0.005 | 1 | K.VLNEEERK.R          |
| 459 - 468 | 1211.556 | 1210.549 | 1210.613 | -0.064 | 0 | R.LCENIANHLK.D        |

---
